# Supplementary material for: NO-ferroheme is a signaling entity in the vasculature
Source: Springer Nature journal article supplement (doi:10.1038/s41589-023-01411-5), 2023-09-14
Supplement: MOESM1 [file 41589_2023_1411_MOESM1_ESM.pdf]

# NO-ferroheme is a signaling entity in the vasculature

---

In the format provided by the  
authors and unedited

## Table of Contents

|                                                                                                                                        |          |
|----------------------------------------------------------------------------------------------------------------------------------------|----------|
| <b>Supplementary Figures.....</b>                                                                                                      | <b>1</b> |
| <b>Supplementary Figure 1.</b> Comparison of vasorelaxations induced by NO-ferroheme myoglobin and L-cysteine preparations.....        | 1        |
| <b>Supplementary Figure 2.</b> Vasorelaxation responses to NO-ferroheme myoglobin and authentic NO in intact and denuded vessels. .... | 2        |
| <b>Supplementary Figure 3.</b> Partition of NO-ferroheme from NO-ferroheme-L-Cys solution to 1-octanol.....                            | 3        |
| <b>Supplementary Figure 4.</b> Partition of NO-ferroheme species to HEK 293 cells.....                                                 | 4        |
| <b>Supplementary Figure 5.</b> Partition of NO-ferroheme to RBC after in vivo administration of NO-ferroheme-Mb.....                   | 5        |
| <b>Supplementary Figure 6.</b> The cardiovascular effects <i>in vivo</i> of myoglobin (Mb), NO-ferroheme-Mb and NO preparations.....   | 6        |
| <b>Supplementary Figure 7.</b> The cardiovascular effects <i>in vivo</i> of globin free preparation with NO-ferroheme-L-cysteine.....  | 7        |
| <b>Supplementary Figure 8.</b> Integral analysis of the cardiovascular responses to NO and NO-ferroheme preparations.....              | 8        |

## Supplementary Figures

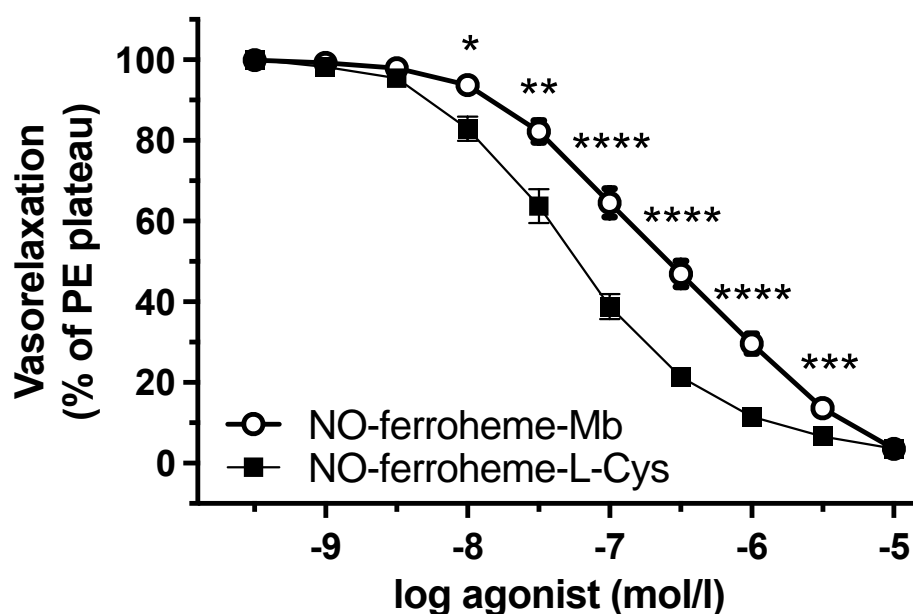

**Supplementary Figure 1. Comparison of vasorelaxations induced by NO-ferroheme myoglobin and L-cysteine preparations.**

*Ex vivo* vasorelaxation responses of aortic rings to increasing concentrations of NO-ferroheme-Mb ( $n=31$ ) and NO-ferroheme-L-cysteine ( $n=27$ ), using the myograph system in the presence of 0.3 mM L-NAME. Data was analyzed by two-way repeated measures ANOVA followed by Šídák's multiple comparisons test. Vasorelaxation responses are shown as percent (%) of phenylephrine (PE)-induced plateau, and the data are presented as mean  $\pm$  s.e.m.  $n$  represents the number of mouse aortic rings used in different myograph chambers. \* denotes  $p \leq 0.05$ , \*\* $p \leq 0.01$ , \*\*\* $p \leq 0.001$  and \*\*\*\* $p \leq 0.0001$  respectively.

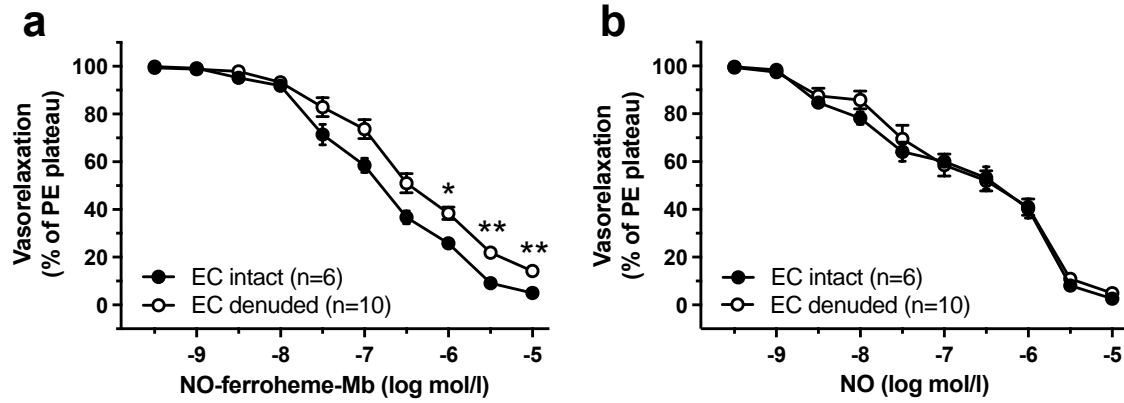

**Supplementary Figure 2. Vasorelaxation responses to NO-ferroheme myoglobin and authentic NO in intact and denuded vessels.**

*Ex vivo* vasorelaxation responses of aortic rings to increasing concentrations of NO-ferroheme-Mb (a-b) and authentic NO (c-d) in intact and denuded vessels with simultaneous treatment with the NOS inhibitor L-NAME (0.3 mmol/L). Data was analyzed by two-way repeated measures ANOVA followed by Šídák's multiple comparisons test. Vasorelaxation responses are shown as percent (%) of phenylephrine (PE)-induced plateau, and the data are presented as mean  $\pm$  s.e.m.  $n$  represents the number of mouse aortic rings used in different myograph chambers. \* denotes  $p \leq 0.05$ , \*\* $p \leq 0.01$ , respectively.

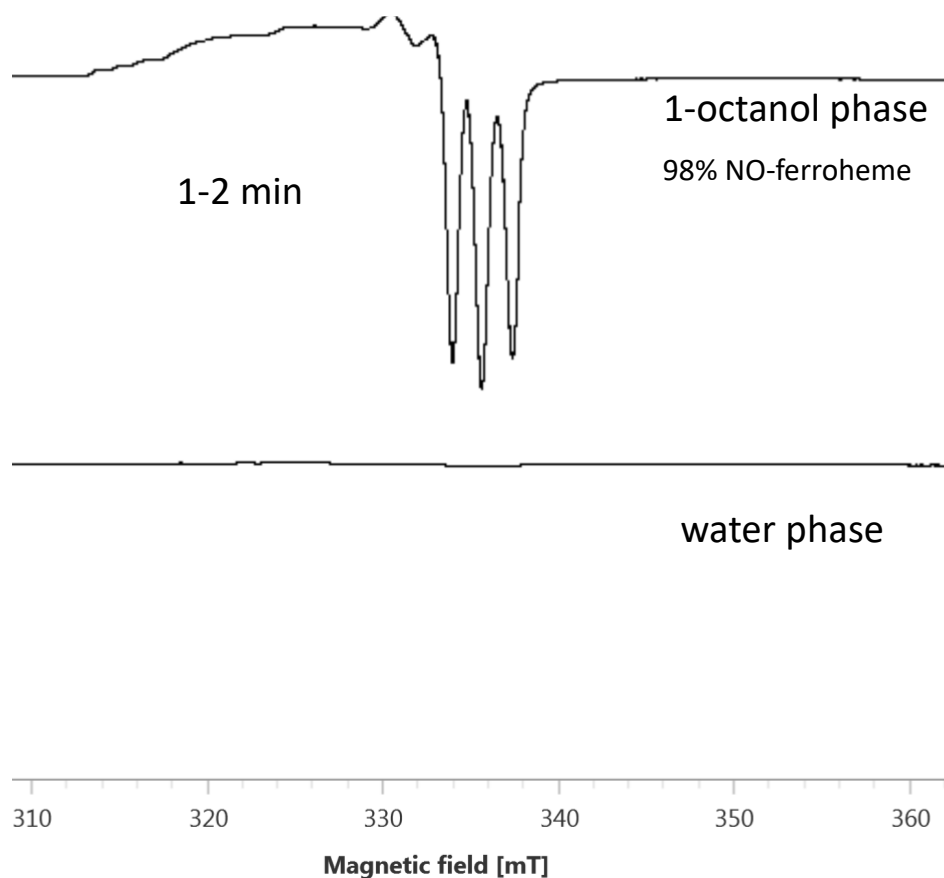

**Supplementary Figure 3. Partition of NO-ferroheme from NO-ferroheme-L-Cys solution to 1-octanol.**

Partition of NO-ferroheme as 5-coordinated species from NO-ferroheme-L-Cys preparation to 1-octanol phase. NO-ferroheme-L-Cys solution (0.5mM; 1 ml) was mixed with equal volume of deoxygenated 1-octanol, vortexed for 1min and centrifugated (2min). Upper (1-octanol) phase rapidly became red, while lower (water) phase became collarless. Samples from 1-octanol and water phases were analyzed by an X-band EPR at 77K. Double integration of the EPR signals indicated that 5-cood NO-ferroheme groups rapidly and nearly completely partitioned to 1-octanol phase. Representative spectra of 2 experiments.

### a HEK cells + NO-ferroheme-Mb

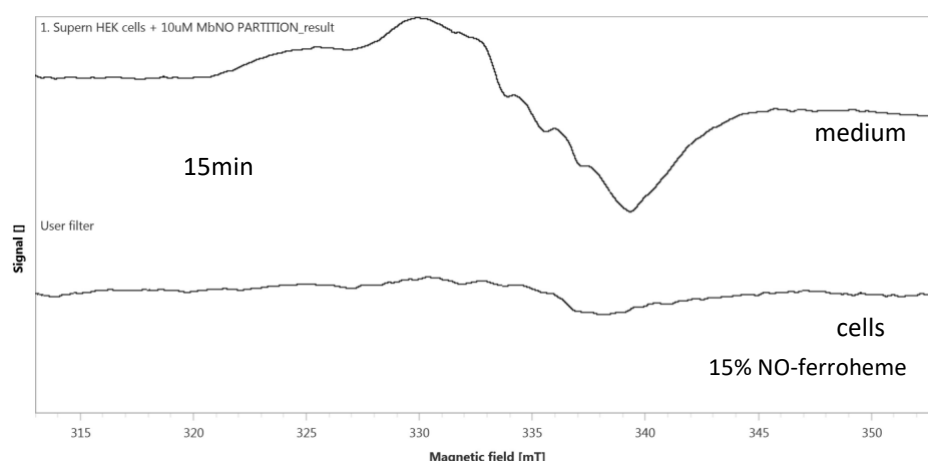

### b HEK cells + NO-ferroheme-L-Cys

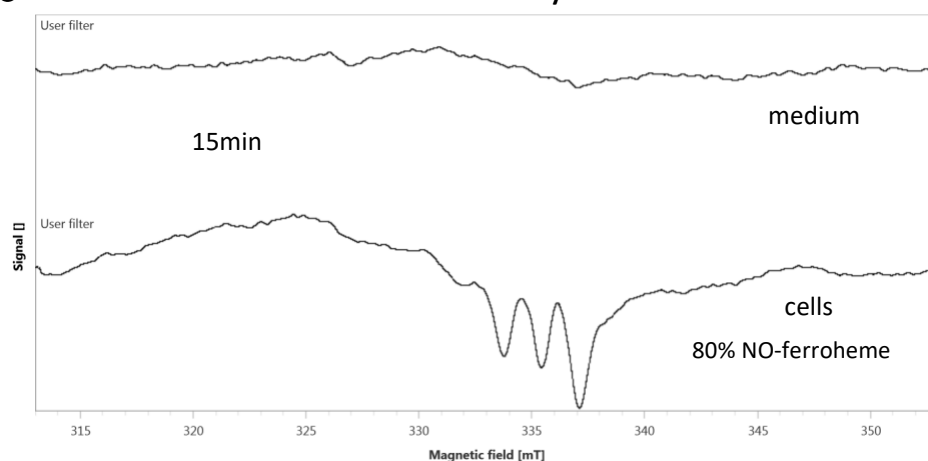

#### Supplementary Figure 4. Partition of NO-ferroheme species to HEK 293 cells.

Cell suspension (1:1 in PBS;  $1.5 \times 10^8$  cells/ml) were incubated (37°C; 15 min) either with 10  $\mu$ M NO-ferroheme-Mb **(a)** or 10  $\mu$ M NO-ferroheme-L-Cys **(b)** and then centrifuged. Samples from the medium/cells were analysed by an X-band EPR at 77K. Double integration of the EPR signals revealed that when NO-ferroheme-Mb was applied, about 15% of NO-ferroheme groups became associated with the cell fraction **(a)**; when NO-ferroheme-L-Cys were applied, up to 80% of NO-ferroheme groups were transferred to cells. Representative spectra of 2-3 experiments.

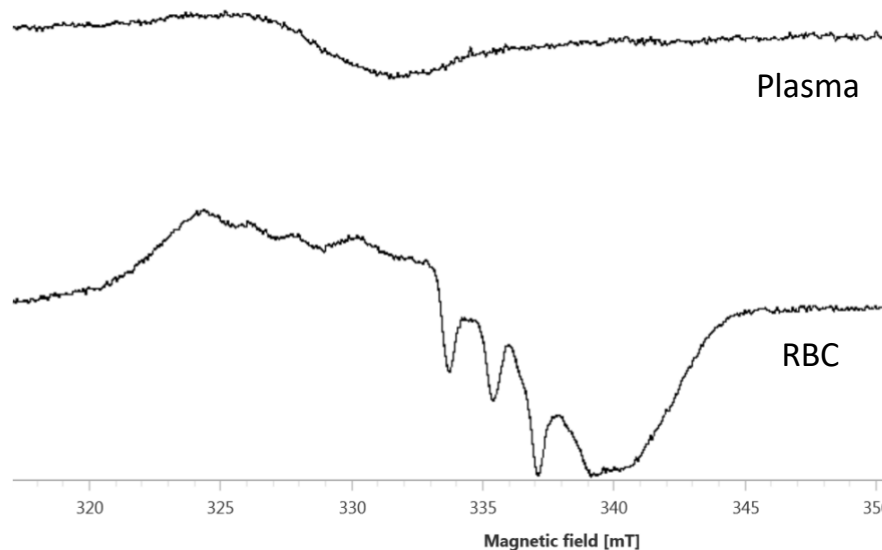

**Supplementary Figure 5. Partition of NO-ferroheme to RBC after in vivo administration of NO-ferroheme-Mb.**

Accumulation of NO-ferroheme species to red blood cells (RBC) 30 min after i.v. injection of NO-ferroheme-Mb (1600 nmol/kg). Blood plasma samples exhibited only EPR signal with  $g = 2.05$ , which is characteristic for  $\text{Cu}^{2+}$  ceruloplasmin. In contrast, RBCs demonstrated a mixed NO-ferroheme EPR signal. These data are consistent with our other results on NO-ferroheme transfer from exogenous NO-ferroheme-Mb to cells and tissues. EPR recording using an X-band EPR Magnetech 5000 at 77K.

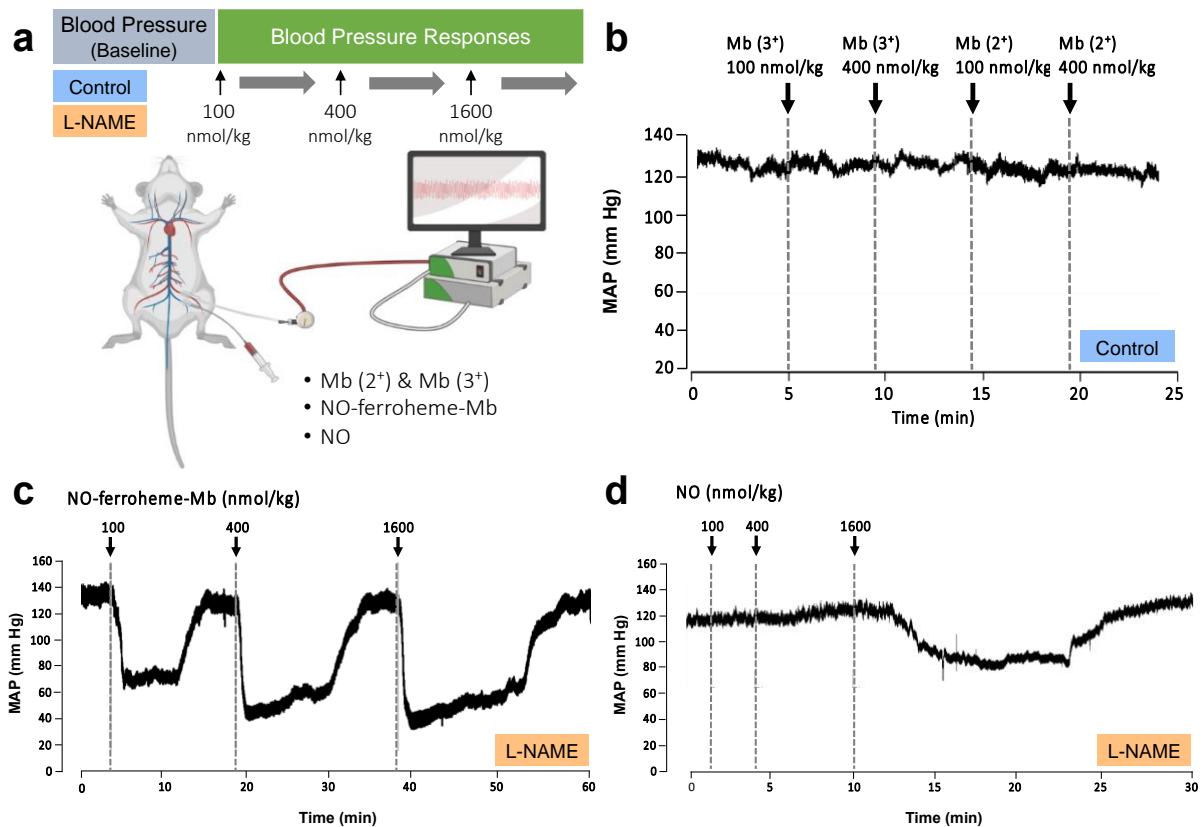

**Supplementary Figure 6. The cardiovascular effects *in vivo* of myoglobin (Mb), NO-ferroheme-Mb and NO preparations.**

**a.** The blood responses to intravenous injection of different doses of ferro-Mb (Mb<sup>2+</sup>), ferri-Mb (Mb<sup>3+</sup>), NO-ferroheme-Mb and authentic NO in anaesthetized Wistar rats with regular water or supplemented with L-NAME (1g/L). **b.** No significant effects of Mb(2<sup>+</sup>) or Mb(3<sup>+</sup>) on blood pressure were observed in control rats, as illustrated by representative trace. **c-d.** Traces of blood pressure in response to increasing bolus doses of NO-ferroheme-Mb (**c**) and authentic NO (**d**) in L-NAME treated rats. Administration of NO-ferroheme-Mb showed profound and dose-dependent reductions of blood pressure which were potentiated in rats with NOS inhibition. Authentic NO significantly reduced blood pressure only at highest dose (1600 nmol/kg) and this effect was not affected by L-NAME.



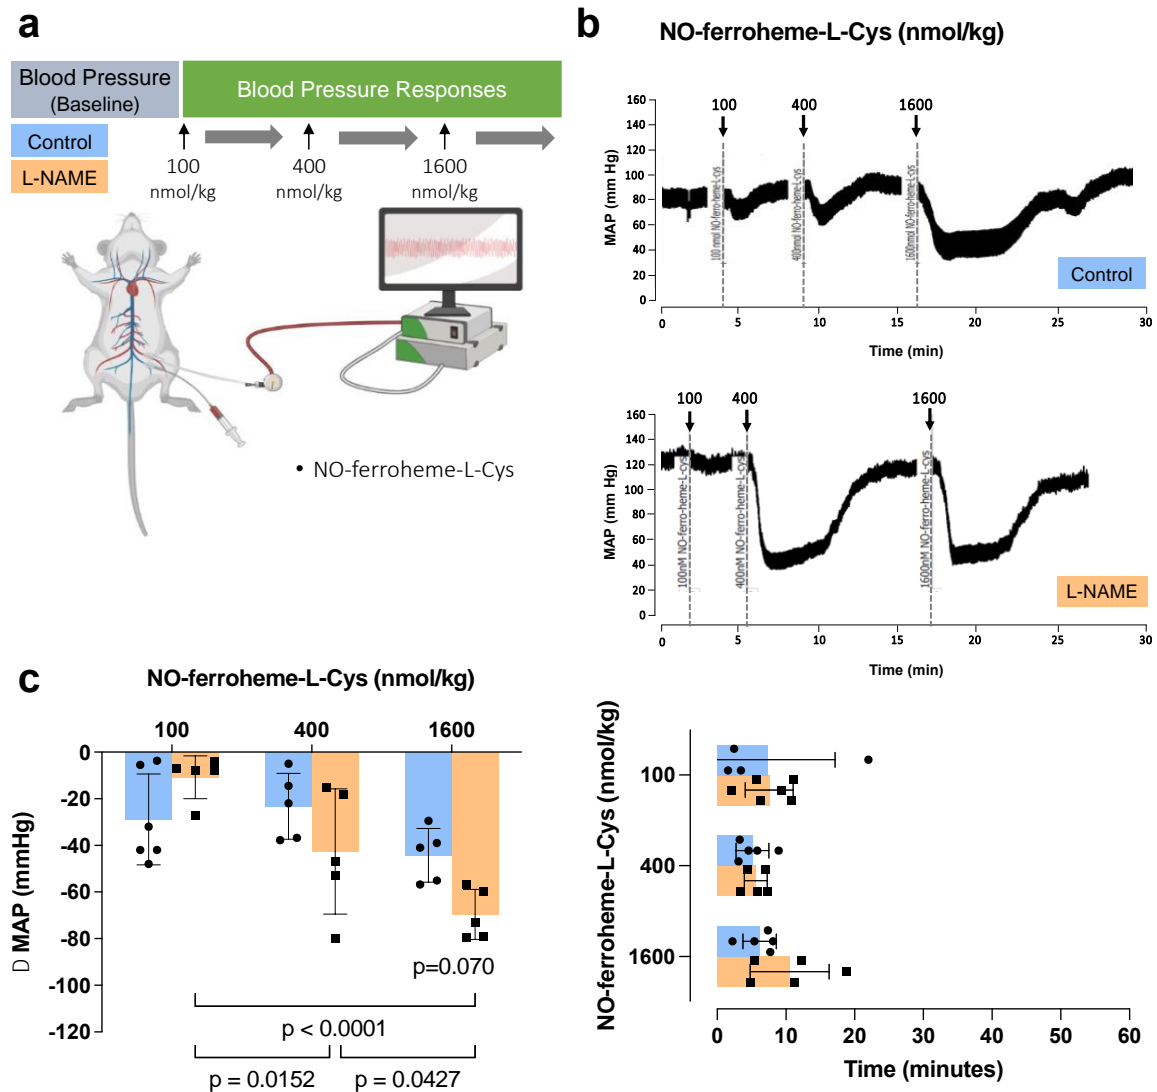

**Supplementary Figure 7. The cardiovascular effects *in vivo* of globin free preparation with NO-ferroheme-L-cysteine.**

**a.** The blood responses to intravenous injection of different doses of NO-ferroheme-L-Cys were analyzed in anaesthetized Wistar rats with regular water or supplemented with L-NAME (1g/L). **b.** Traces of blood pressure responses to increasing bolus doses of NO-ferroheme-L-cys in Control rats (*top panel*) and L-NAME treated rats (*lower panel*). **c.** Similar to NO-ferroheme-Mb, administration of NO-ferroheme-L-Cys dose-dependently lowered blood pressure and this effect was enhanced by L-NAME. However, the duration of the responses was shorter than that observed with NO-ferroheme-Mb (Compare with Figure 6 and Figure S3). Data analyzed with two-way ANOVA (mixed-effects model) followed by Šídák's multiple comparisons test. The dots in **c** represents the responses in different animals, and data are presented as mean  $\pm$  s.d. P-values for statistically significant differences are indicated. Non-significant p-value ( $p=0.07$ ) is comparison between Control and L-NAME treated rats given the highest dose.

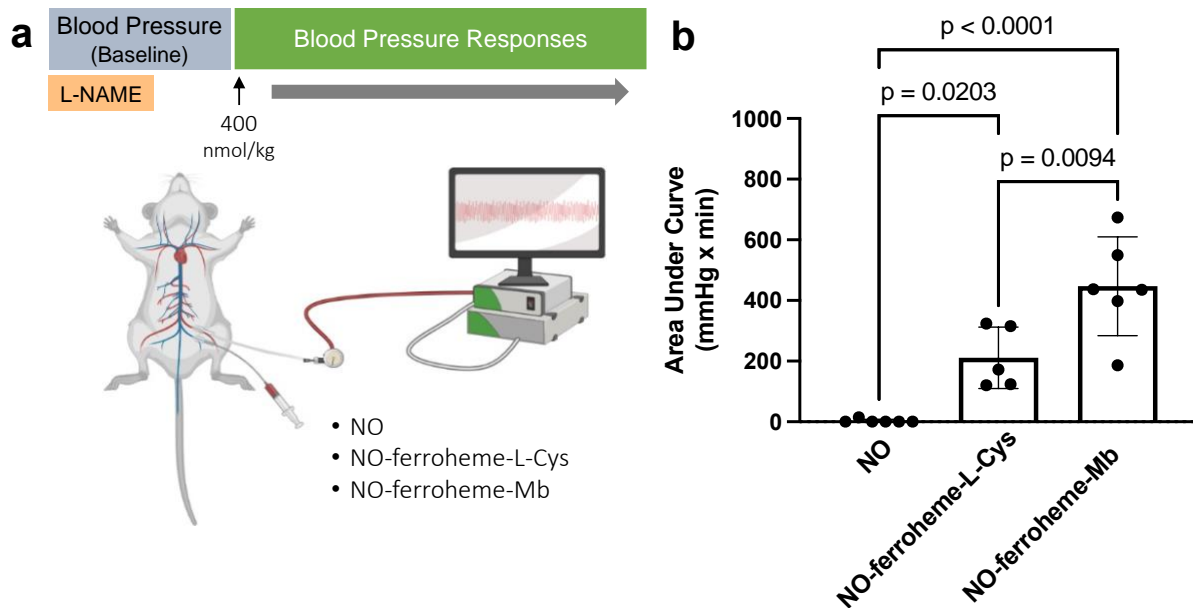

**Supplementary Figure 8. Integral analysis of the cardiovascular responses to NO and NO-ferroheme preparations.**

**a.** The overall blood responses to intravenous bolus injection of 400 nmol/kg of authentic NO, NO-ferroheme-L-Cys and NO-ferroheme-Mb were analyzed using LabChart reader v.8.1.22 and calculated as the integral of the total response (*i.e.* magnitude of blood pressure change in mmHg multiplied by the duration of the response in minutes). **b.** Analysis of the integral response (Area Under Curve) show that efficiency of NO-ferroheme-Mb was several-fold higher than that of NO-ferroheme-L-Cys, which in turn was more effective than authentic NO. Data analyzed with two-way ANOVA (mixed-effects model) followed by Šídák's multiple comparisons test. The dots in **b** represents the responses in different animals, and data are presented as mean  $\pm$  s.d. P-values for statistically significant differences are indicated.
